# Supplementary material for: Novel STAT3 Inhibitor LDOC1 Targets Phospho-JAK2 for Degradation by Interacting with LNX1 and Regulates the Aggressiveness of Lung Cancer
Source: PubMed Central journal article supplement (PMC6356782; doi:10.3390/cancers11010063), 2019-01-09

## Supplementary Materials: Novel STAT3 Inhibitor LDOC1 Targets Phospho-JAK2 for Degradation by Interacting with LNX1 and Regulates the Aggressiveness of Lung Cancer

Chia-Huei Lee, Ji-Rui Yang, Chih-Yu Chen, Ming-Hsien Tsai, Pin-Feng Hung, Shin-Jih Chen, Shang-Lun Chiang, Han Chang and Pinpin Lin

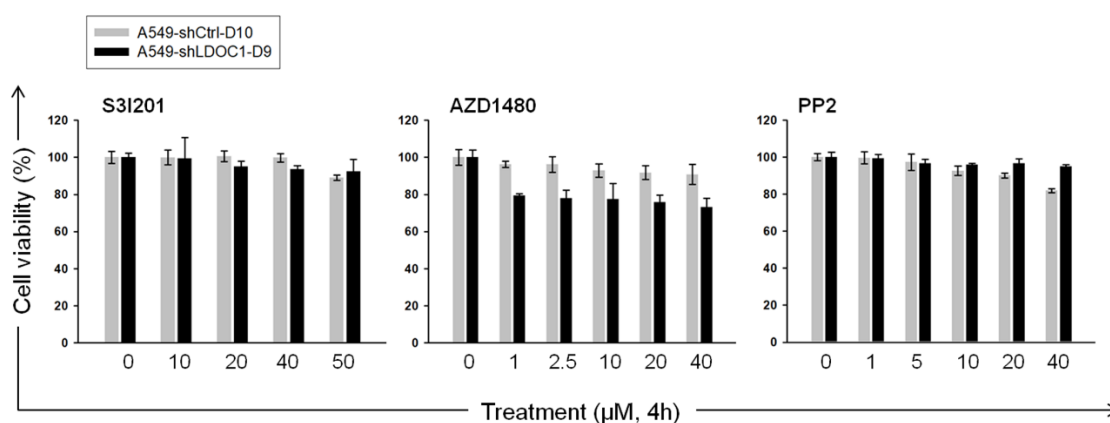

**Figure S1.** The cytotoxicity of S3I201, AZD1480, and PP2 on lung cancer cell lines A549-shCtrl-D10 and A549-shLDOC1-D9. Cell viability was assessed using an MTT assay after a 4-h pre-treatment with the indicated concentrations of inhibitors of STAT3 (S3I201), Jak2 (AZD1480), and Src (PP2).

**Table S1.** Information on qMSP primers for LDOC1.

| Regions  | Primers   | Sequence 5'-3'              | Location <sup>a</sup> | Amplicom (bp) | # CpG <sup>b</sup> |
|----------|-----------|-----------------------------|-----------------------|---------------|--------------------|
| mLDOC1-1 | mLDOC1-4F | 5'-CGGTGTTTTTTTCGAAAC-3'    | -460                  | 108           | 14                 |
|          | mLDOC1-4R | 5'-CGTCGTTACAAAATCGATTC-3'  | -567                  |               |                    |
| mLDOC1-2 | mLDOC1-3F | 5'-CGAGAGGGTTAGTTTGTTC-3'   | -417                  | 126           | 15                 |
|          | mLDOC1-3R | 5'-ACGAACATATAAAAACGCCGT-3' | -542                  |               |                    |
| mLDOC1-3 | mLDOC1-2F | 5'-CGTGGATACGTATTTTTTGC-3'  | -227                  | 128           | 13                 |
|          | mLDOC1-2R | 5'-CATCAAAAACGCGTACAAC-3'   | -354                  |               |                    |
| mLDOC1-4 | mLDOC1-1F | 5'-TGAGATCGGATTTAGCGTTC-3'  | -6                    | 130           | 8                  |
|          | mLDOC1-1R | 5'-CTAAATCGCTAAACCACCGA-3'  | 124                   |               |                    |

<sup>a</sup> The 5' nucleotide number where the primer begins (from transcription start site). <sup>b</sup> Amount of CpG dinucleotides.

**Table S2.** qPCR primers for LDOC1, IL-6, and 18S rRNA.

| Symbol   | Primers | Sequence 5'-3'                 |
|----------|---------|--------------------------------|
| LDOC1    | LDOC1-F | 5'-ATGACGACGAAGACGACGA-3'      |
|          | LDOC1-R | 5'-GAGGGTCGAGGGCCTAATAA-3'     |
| IL-6     | IL-6-F  | 5'-GATGAGTACAAAAGTCCTGATCCA-3' |
|          | IL-6-R  | 5'-CTGCAGCCACTGGTTCTGT-3'      |
| 18S rRNA | 18Sr-F  | 5'-TGTGCCGCTAGAGGTGAAATT-3'    |
|          | 18Sr-R  | 5'-TGGCAAATGCTTTCGCTTT-3'      |

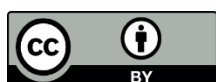

Supplement: cancers-11-00063-s001.pdf [file cancers-11-00063-s001.pdf]
